# Supplementary material for: Polyethylene glycol and divalent salt-induced DNA reentrant condensation revealed by single molecule measurements
Source: Royal Society of Chemistry journal article supplement (doi:10.1039/c5sm00619h), 2015-01-01
Supplement: c5sm00619h1.pdf [file c5sm00619h1.pdf]

**1. Viscosity measurements.** To measure viscosity, a latex bead ensemble with a known size ( $\sim 200$  nm in radius) in the two PEG solutions were measured by dynamic light scattering method (Malvern Zetasizer Nano-ZS90) in order to infer the viscosity of the PEG solutions using Stokes-Einstein relation. The viscosity was set as the parameter of water ( $\eta_{water}$ ) in the size measurements, which resulted in a larger measured value compared with its real size ( $r_{real}$ ). Then, the measured size ( $r_{measured}$ ) has a relationship with the viscosity of the PEG solution according to Stokes-Einstein relation:  $\frac{\eta_{water}}{\eta_{PEG}} = \frac{r_{real}}{r_{measured}}$ . Figure S1 gives the results of the size measurements. Using the results and the relationship, it was inferred that the viscosity of PEG 600 is  $\sim 3.9$  times of the viscosity of water, and the ratio is  $\sim 4.5$  for PEG 6000.

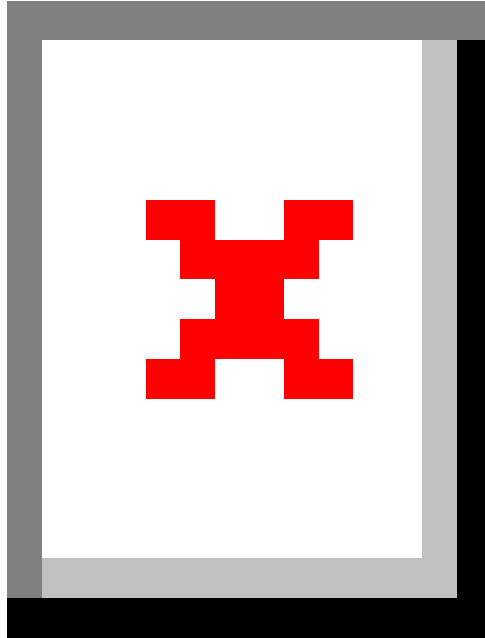

Fig. S1 Size measurements of a latex ensemble ( $\sim 200$  nm in radius) in different solutions by dynamic light scattering.

## 2. Relaxation dynamics by varying the external force.

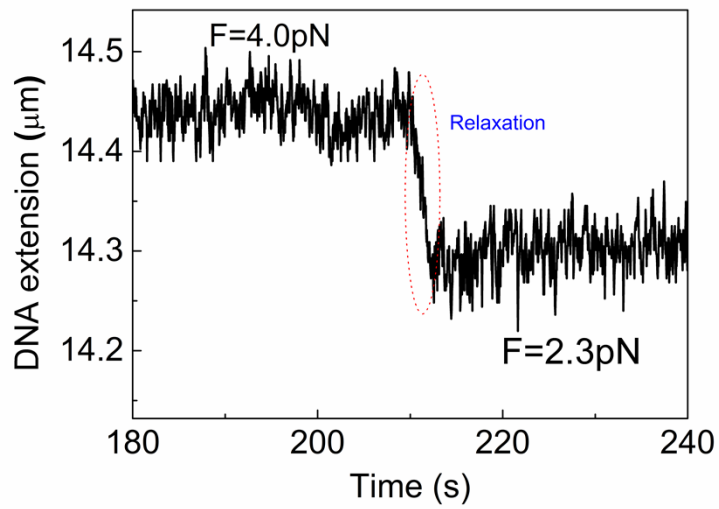

Fig. S2 The relaxation curve of DNA conformation by varying the external force ( $F$ ) from 4.0 pN to 2.3 pN. The circled region indicated that the relaxation took less than 2 sec.
